# Supplementary material for: Hydrogen peroxide sensors for cellular imaging based on horse radish peroxidase reconstituted on polymer-functionalized TiO2 nanorods
Source: Royal Society of Chemistry journal article supplement (doi:10.1039/c1nr10587f), 2011-01-01
Supplement: c1nr10587f.pdf [file c1nr10587f.pdf]

# Hydrogen Peroxide Sensors for Cellular Imaging Based on Horse Radish Peroxidase Reconstituted on Polymer-Functionalized TiO<sub>2</sub> Nanorods

Muhammad Nawaz Tahir<sup>a\*</sup>, Rute André<sup>a</sup>, Jugal Kishore Sahoo<sup>a</sup>, Florian D. Jochum<sup>b</sup>, Patrick Theato<sup>c</sup>, Filipe Natalio<sup>a</sup>, Rüdiger Berger<sup>d</sup>, Robert Branscheid<sup>c</sup>, Ute Kolb<sup>c</sup>, Wolfgang Tremel<sup>a\*</sup>  
DOI: 10.1039/b000000x

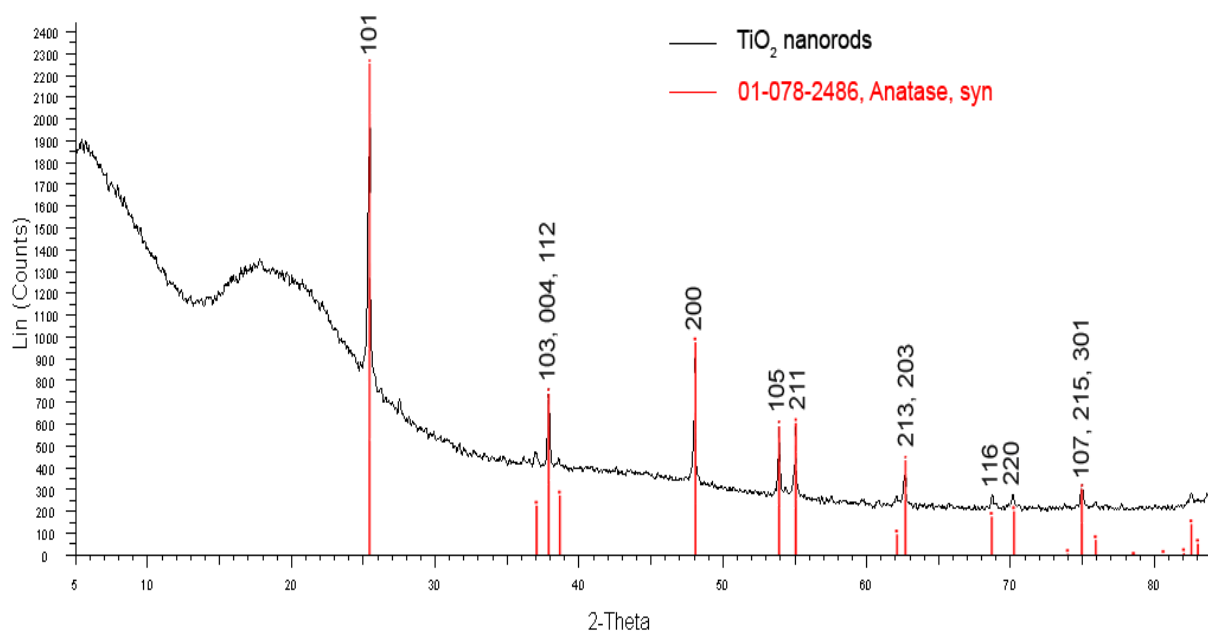

**Fig. S1.** X-ray diffraction pattern of as synthesized  $\text{TiO}_2$  nanorods. The pattern can be fully indexed to anatase.

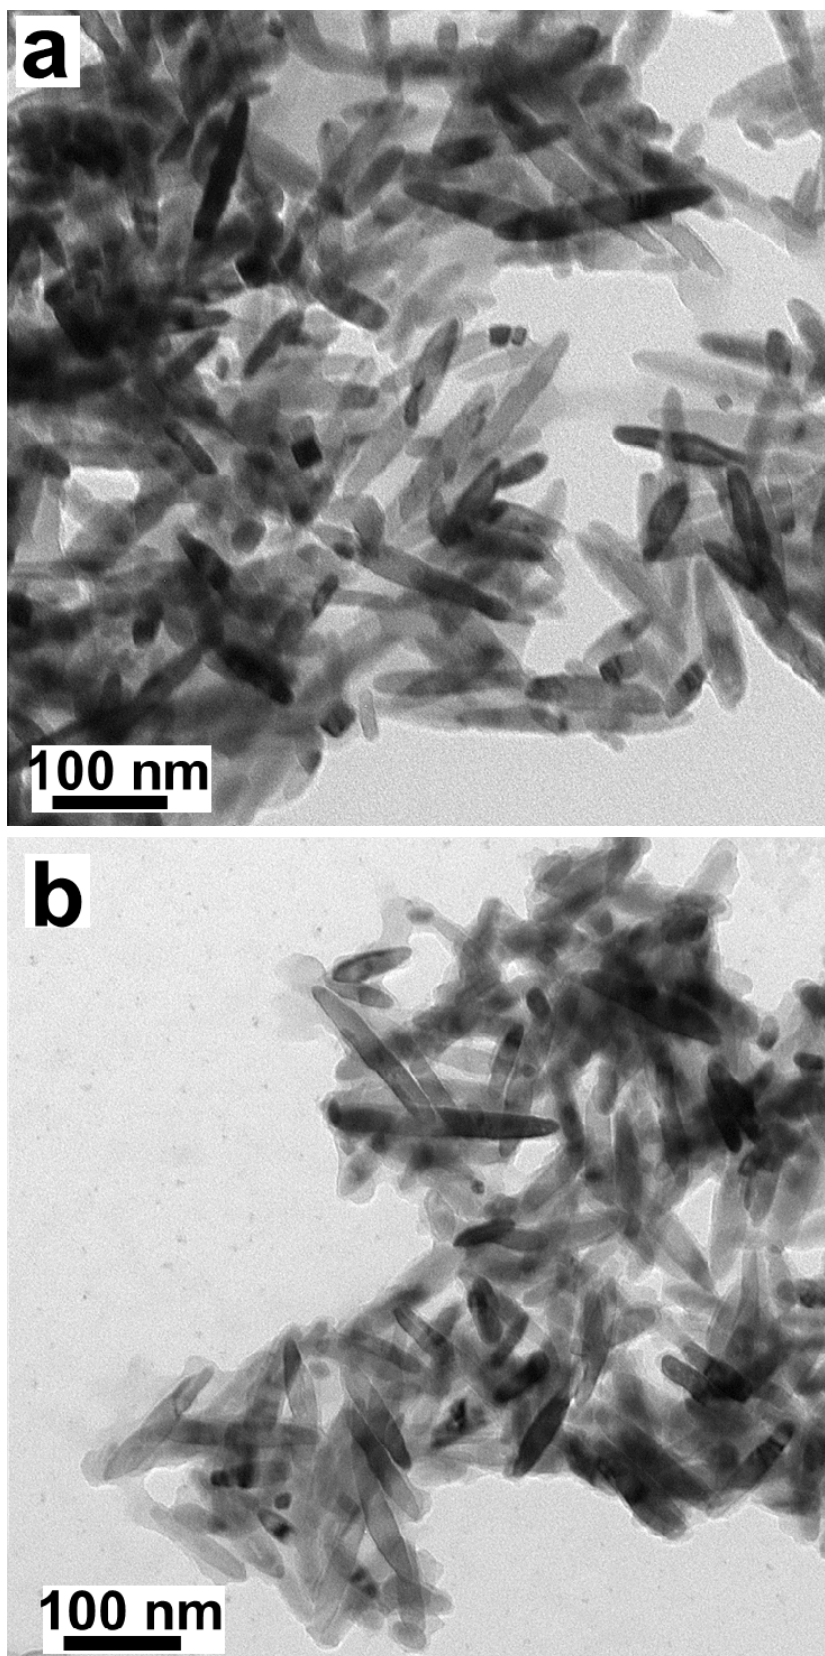

**Fig. S2.** TEM images of (a) polymer functionalized TiO<sub>2</sub> nanorods and (b) after reconstitution of HRP which shows organic matrices at the surface of TiO<sub>2</sub> nanorods.

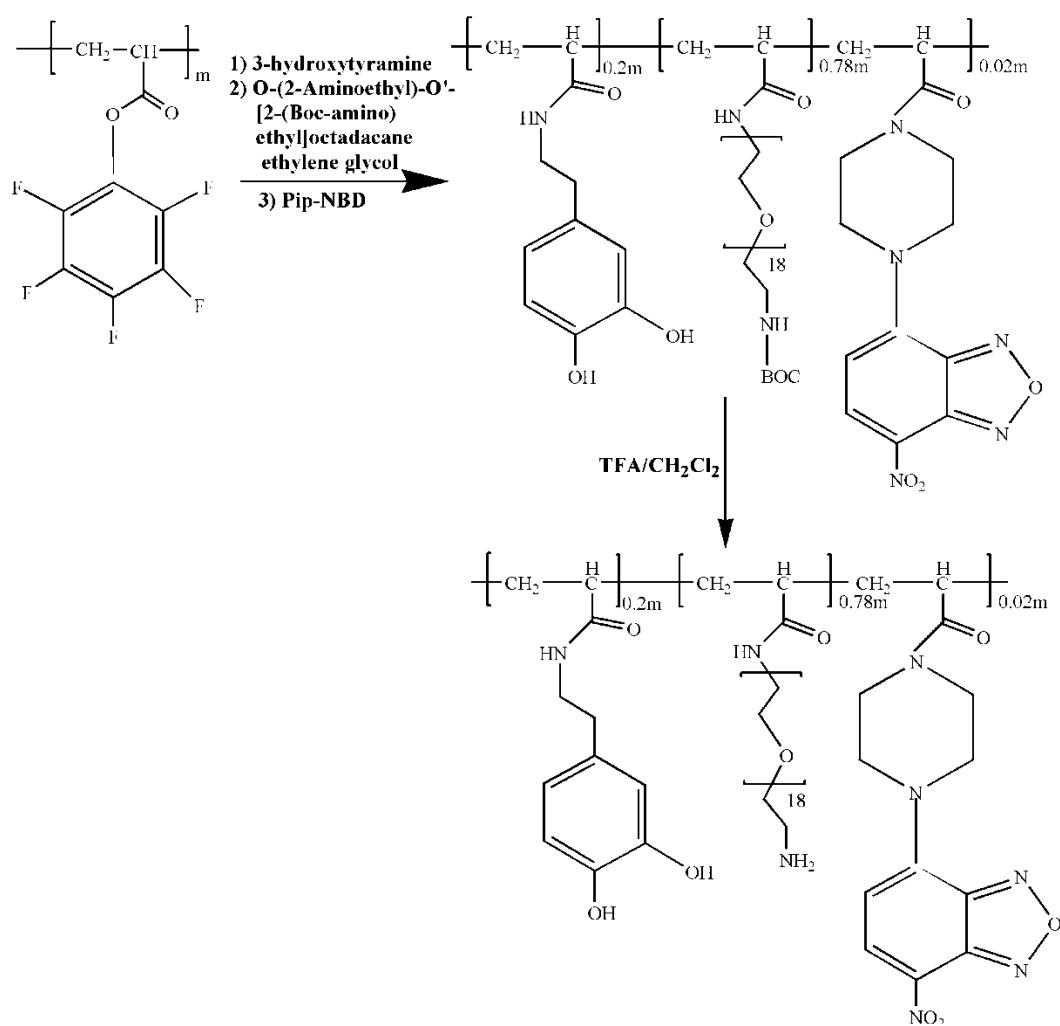

**Scheme S1.** Stepwise synthesis of the multifunctional polymeric ligands, which contain 3-hydroxytyramine as anchors for the nanorods, PEG chain with free amine head groups to further couple functional molecules, and fluorescent dye (NBD used for optical detection).
